# Supplementary material
Source: publisher site journal article supplement (https://www.dovepress.com/article/444451)
Supplement: Supplementary file 1 [file get_supplementary_file.php]

**Supplement Table 1.** Characteristics of coronary artery disease (CAD) patients.

| Variables                               | Total (n=1883)    |
|-----------------------------------------|-------------------|
| Sex, n (%)                              |                   |
| Male                                    | 1483 (78.76)      |
| Female                                  | 400 (21.24)       |
| Age, years, Mean $\pm$ SD               | 64.61 $\pm$ 10.74 |
| Residence, n (%)                        |                   |
| Urban                                   | 972 (51.62)       |
| Rural                                   | 330 (17.53)       |
| Town                                    | 581 (30.86)       |
| Smoking, n (%)                          |                   |
| Smoking                                 | 1004 (53.32)      |
| Non-smoking                             | 742 (39.41)       |
| Former smoked                           | 137 (7.28)        |
| Drinking alcohol, n (%)                 |                   |
| Frequently                              | 499 (26.50)       |
| No                                      | 1108 (58.84)      |
| Sometimes                               | 239 (12.69)       |
| Ever drinking                           | 37 (1.96)         |
| Diabetes mellitus, n (%)                |                   |
| No                                      | 1169 (62.08)      |
| Yes                                     | 714 (37.92)       |
| Hypertension, n (%)                     |                   |
| No                                      | 690 (36.64)       |
| Yes                                     | 1193 (63.36)      |
| Hyperlipidemia, n (%)                   |                   |
| No                                      | 1805 (95.86)      |
| Yes                                     | 78 (4.14)         |
| CAD, n (%)                              |                   |
| No                                      | 1379 (73.23)      |
| Yes                                     | 504 (26.77)       |
| History of coronary intervention, n (%) |                   |
| No                                      | 1409 (74.83)      |
| Yes                                     | 474 (25.17)       |
| Stroke, n (%)                           |                   |
| No                                      | 1844 (97.93)      |
| Yes                                     | 39 (2.07)         |
| Emergency coronary intervention, n (%)  |                   |
| Yes                                     | 1430 (75.94)      |
| No                                      | 453 (24.06)       |
| Severity of lesion, n (%)               |                   |
| Single branch                           | 687 (36.48)       |
| Double branch                           | 554 (29.42)       |
| Three branches                          | 538 (28.57)       |

| Variables                                                                                    | Total (n=1883)         |
|----------------------------------------------------------------------------------------------|------------------------|
| Four branches                                                                                | 104 (5.52)             |
| Gensini score, M (Q <sub>1</sub> , Q <sub>3</sub> )                                          | 52.00 (32.00, 78.00)   |
| Number of implanted stents, n (%)                                                            |                        |
| One                                                                                          | 566 (30.15)            |
| Two                                                                                          | 626 (33.35)            |
| Three                                                                                        | 368 (19.61)            |
| Four                                                                                         | 226 (12.04)            |
| Five                                                                                         | 71 (3.78)              |
| Six                                                                                          | 20 (1.07)              |
| Troponin I level, µg/L, M (Q <sub>1</sub> , Q <sub>3</sub> )                                 | 0.04 (0.01, 2.63)      |
| N-terminal pro-B-type natriuretic peptide level, pg/mL, M (Q <sub>1</sub> , Q <sub>3</sub> ) | 206.85 (69.75, 808.50) |
| Serum creatinine, µmol/L, M (Q <sub>1</sub> , Q <sub>3</sub> )                               | 79.00 (68.00, 92.00)   |
| Total cholesterol, mmol/L, M (Q <sub>1</sub> , Q <sub>3</sub> )                              | 4.09 (3.36, 4.87)      |
| Low-density lipoprotein cholesterol, mmol/L, M (Q <sub>1</sub> , Q <sub>3</sub> )            | 2.66 (2.05, 3.33)      |
| High-density lipoprotein cholesterol, mmol/L, Mean ± SD                                      | 1.02 ± 0.28            |
| Triglyceride, mmol/L, M (Q <sub>1</sub> , Q <sub>3</sub> )                                   | 1.43 (1.10, 2.02)      |
| Glucose, mmol/L, M (Q <sub>1</sub> , Q <sub>3</sub> )                                        | 5.99 (5.22, 7.77)      |
